# Supplementary material
Source: MDPI journal article supplement (https://www.mdpi.com/1999-4907/14/1/71)
Supplement: s1 [file s1]

Table S1 Analysis of leaf element variance of ZF and ZQ

| Element |   | L-N   | L-P   | L-K   | L-Ca  | L-Mg  | L-Fe  | L-B   | L-Cu  | L-Mn  | L-Zn  | L-Mo  |
|---------|---|-------|-------|-------|-------|-------|-------|-------|-------|-------|-------|-------|
| Health  | F | 4.67  | 0.024 | 1.947 | 2.223 | 0.703 | 0.007 | 0.09  | 2.991 | 3.297 | 0.218 | 3.571 |
|         | P | 0.097 | 0.885 | 0.235 | 0.21  | 0.449 | 0.936 | 0.779 | 0.159 | 0.144 | 0.665 | 0.132 |
| Disease | F | 4.081 | 0.388 | 0.208 | 1.536 | 1.012 | 0.027 | 5.592 | 0.206 | 0.777 | 0.02  | 0.143 |
|         | P | 0.113 | 0.567 | 0.672 | 0.283 | 0.371 | 0.877 | 0.077 | 0.673 | 0.428 | 0.894 | 0.725 |

Table S2 Analysis of root element variance of ZF and ZQ

| Element |   | R-N   | R-P   | R-K   | R-Ca  | R-Mg  | R-Fe  | R-B   | R-Cu  | R-Mn   | R-Zn  | R-Mo  |
|---------|---|-------|-------|-------|-------|-------|-------|-------|-------|--------|-------|-------|
| Health  | F | 1.079 | 1.242 | 0.362 | 3.286 | 0.117 | 0.112 | 4.966 | 2.949 | 16.314 | 0.683 | 2.41  |
|         | P | 0.358 | 0.327 | 0.58  | 0.144 | 0.749 | 0.755 | 0.09  | 0.161 | 0.016  | 0.455 | 0.196 |
| Disease | F | 1.079 | 1.242 | 0.362 | 3.286 | 0.117 | 0.112 | 4.966 | 2.949 | 16.314 | 0.683 | 2.41  |
|         | P | 0.358 | 0.327 | 0.58  | 0.144 | 0.749 | 0.755 | 0.09  | 0.161 | 0.016  | 0.455 | 0.196 |

Table S3 Analysis of soil element variance of ZF and ZQ

| Element |   | S-N    | S-P    | S-K   | S-AK  | S-AP   | S-Na  | S-Ca   | S-Mg  | S-Cu  | S-Zn   | S-Fe   | S-Mn  | S-B   | S-S   |
|---------|---|--------|--------|-------|-------|--------|-------|--------|-------|-------|--------|--------|-------|-------|-------|
| Health  | F | 16.901 | 57.416 | 0.032 | 1.285 | 23.047 | 1.77  | 10.416 | 0.011 | 2.597 | 10.585 | 10.329 | 7.898 | 10.62 | 0.242 |
|         | P | 0.015  | 0.002  | 0.868 | 0.32  | 0.009  | 0.254 | 0.032  | 0.921 | 0.182 | 0.031  | 0.032  | 0.048 | 0.031 | 0.649 |
| Disease | F | 67.698 | 0.341  | 0.002 | 1.547 | 5.231  | 0.006 | 0.043  | 0.435 | 0.028 | 0.125  | 0.96   | 0.04  | 0.567 | 0.209 |
|         | P | 0.001  | 0.59   | 0.964 | 0.281 | 0.084  | 0.94  | 0.845  | 0.546 | 0.876 | 0.742  | 0.383  | 0.851 | 0.493 | 0.671 |
